# Supplementary material for: Improvement of field emission performances by DMSO and PEDOT:PSS treated freestanding CNT clusters
Source: Royal Society of Chemistry journal article supplement (doi:10.1039/d2nr04205c), 2022-01-01
Supplement: d2nr04205c1.pdf [file d2nr04205c1.pdf]

### Supporting Information

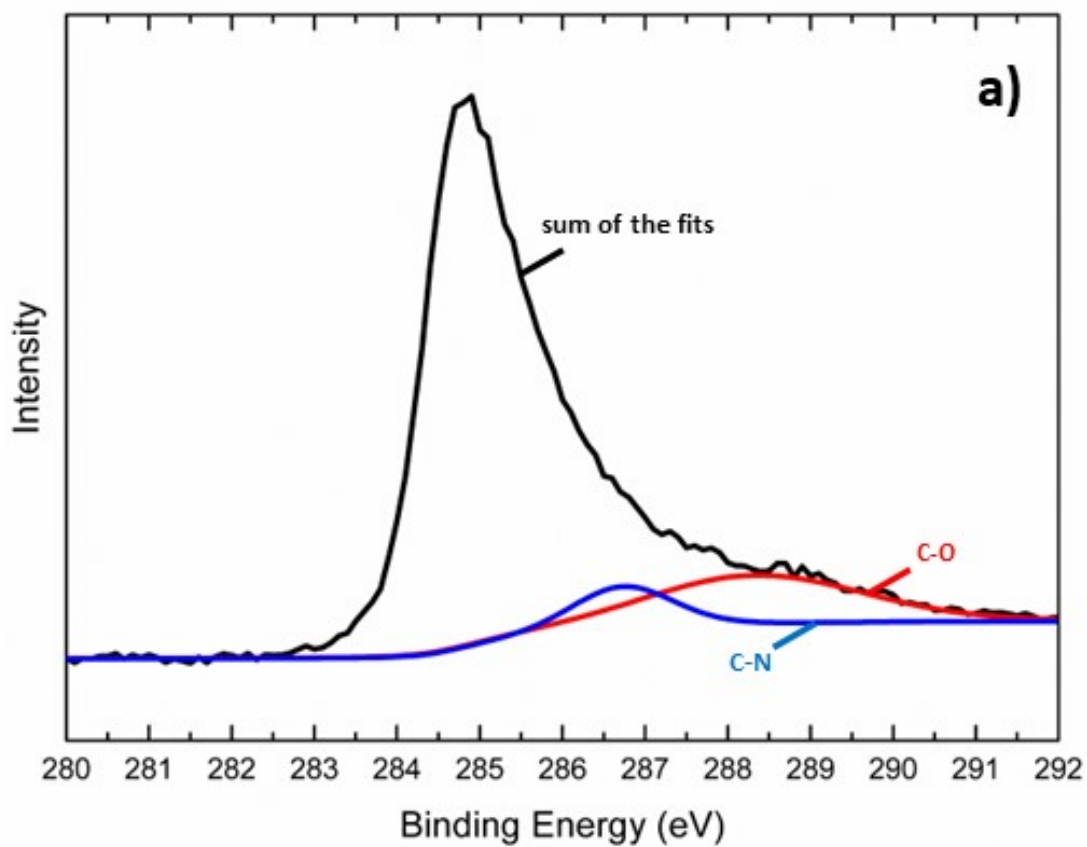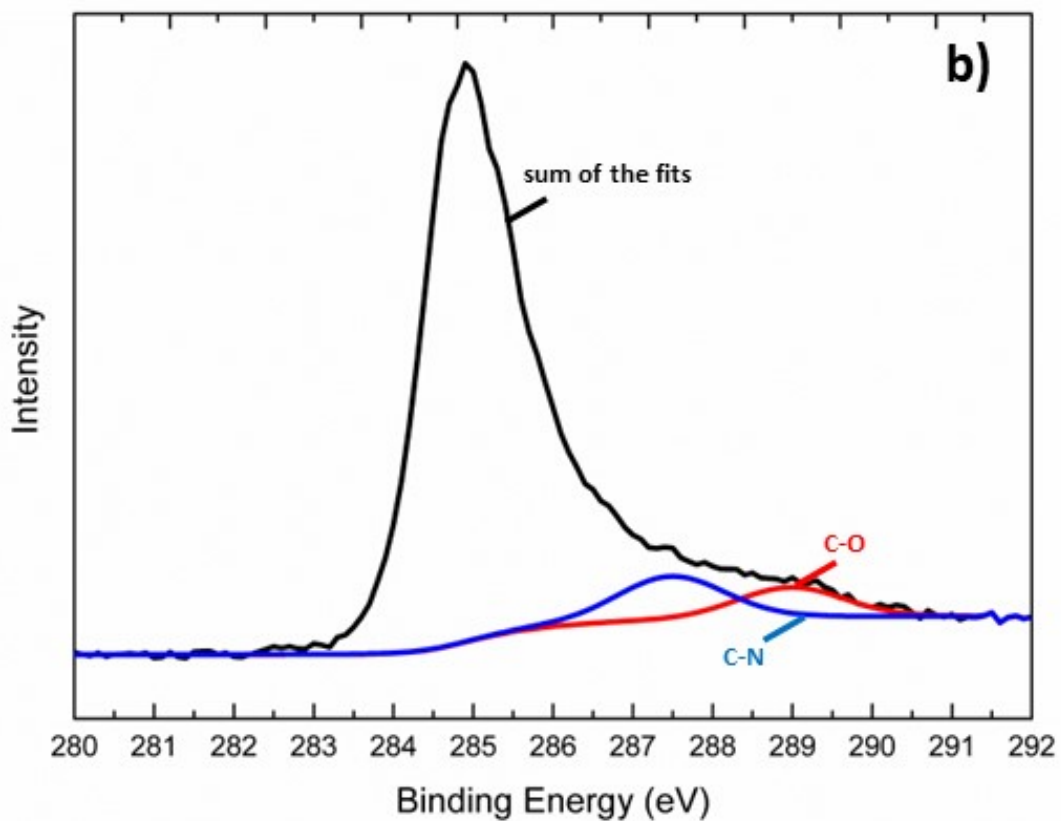

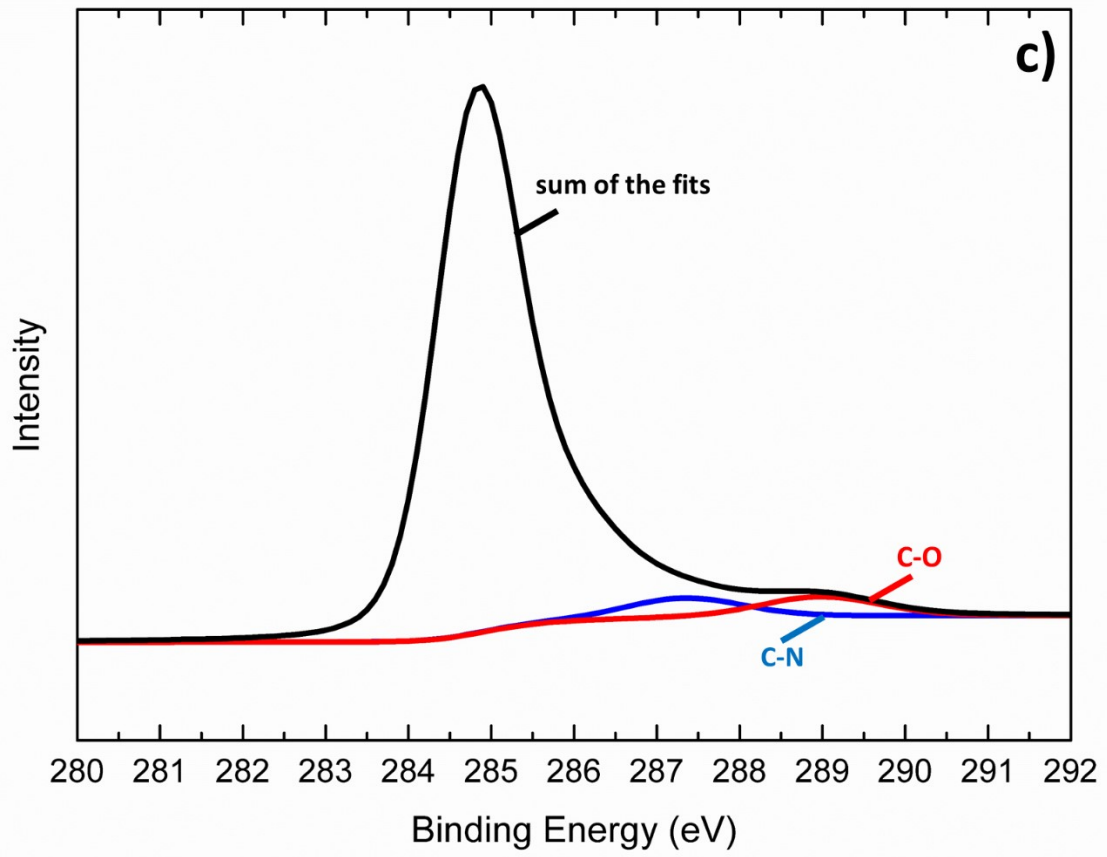

**Figure S1.** the C 1s XPS spectra of CNT emitters. a) without treatment, b) with DMSO treatment, c) with PEDOT: PSS treatment.

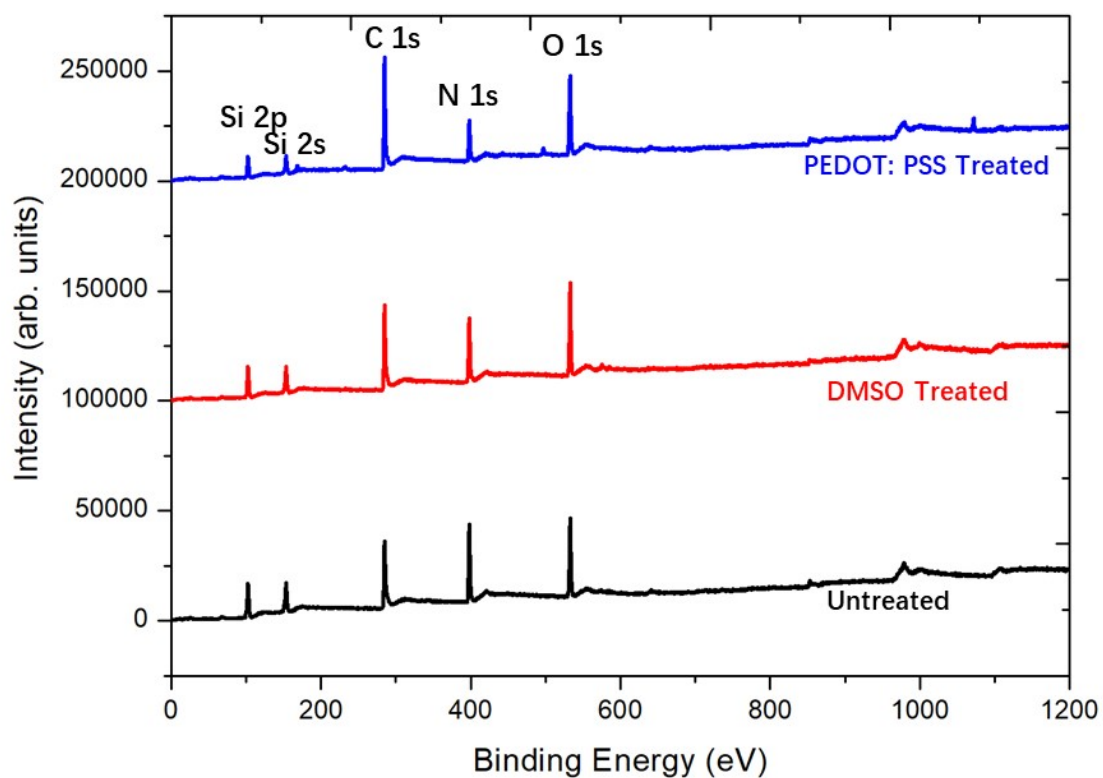

**Figure S2.** XPS spectra of untreated CNT emitter (black), DMSO treated CNT emitter (red) and PEDOT: PSS treated CNT (blue)

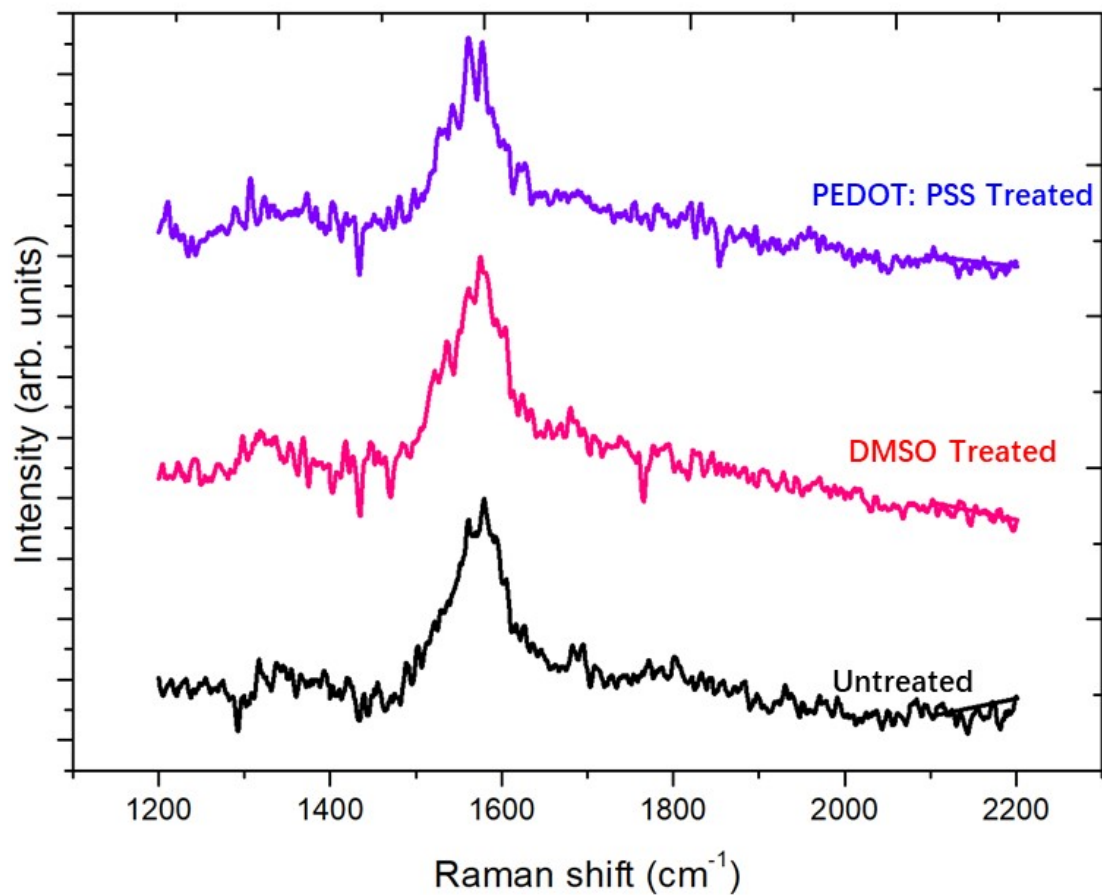

**Figure S3.** Visible Raman spectra of untreated CNT emitter (black), DMSO treated CNT emitter (red) and PEDOT: PSS treated CNT (blue)
